# Supplementary material
Source: MDPI journal article supplement (https://www.mdpi.com/2071-1050/12/7/2734)

7

Other



Other

[illegible]

## Section B: Size and growth

**B1. How many boxes did you sell in the first year? Please give us the average number of boxes per week in the first 12 month.**

|  |  |  |  |  |  |  |  |  |
|--|--|--|--|--|--|--|--|--|
|  |  |  |  |  |  |  |  |  |
|  |  |  |  |  |  |  |  |  |
|  |  |  |  |  |  |  |  |  |
|  |  |  |  |  |  |  |  |  |
|  |  |  |  |  |  |  |  |  |

**B2. How many boxes did you sell last year (2015)? Please give us the average number of boxes per week in 2015.**

[illegible]

**B3. Would you like to (further) increase the number of boxes sold?**

Yes



No

4

**B4. Please state why or why not you would like to increase the number of boxes sold:**

|  |
|--|
|  |
|--|

## Section C: Products and box types

**C1. What products do you sell in the boxes?**

vegetables

7

fruits

|  |  |
|--|--|
|  |  |
|--|--|

meat products

5

fish

7

dairy products

7

cereals, grains, bread, pasta

7

oil, vinegar

7

non-alcoholic drinks

7

|                  |  |
|------------------|--|
| alcoholic drinks |  |
|------------------|--|

|  |  |
|--|--|
|  |  |
|--|--|

|             |  |
|-------------|--|
| tea, coffee |  |
|-------------|--|

|  |  |
|--|--|
|  |  |
|--|--|

conserved products, convenience products

|  |  |
|--|--|
|  |  |
|--|--|

cleaning supplies, detergents, etc.

|  |  |
|--|--|
|  |  |
|--|--|

cosmetics

|  |  |
|--|--|
|  |  |
|--|--|

clothes

7

Other



Other

[illegible]

**C2. How are the products in the boxes produced?**

\* "Non-certified organic": producer claims to work according to organic principles, but is not officially certified.

certified organic products ☐

5

non-certified organic products\*

|  |  |
|--|--|
|  |  |
|--|--|

certified fair trade products

|  |  |
|--|--|
|  |  |
|--|--|

Other



Other

[illegible]

**C3. Please indicate the percentage of each of the product categories that you sell in the boxes:**

*Note: Numbers have to be entered in each field. Please insert 0 if category does not apply.*

[illegible][illegible]

|                                                           | Q1 | Q2 | Q3 | Q4 | Avg |
|-----------------------------------------------------------|----|----|----|----|-----|
| percentage of non-certified organic products in the boxes |    |    |    |    |     |

[illegible][illegible][illegible][illegible]

|  |  |  |  |  |  |  |  |  |
|--|--|--|--|--|--|--|--|--|
|  |  |  |  |  |  |  |  |  |
|--|--|--|--|--|--|--|--|--|

**C4. Do you sell local/regional products in your boxes?**

Yes ☐

7

No

7



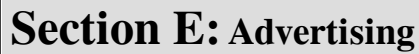

|                      |  |
|----------------------|--|
| newspapers/magazines |  |
|----------------------|--|

flyers

TV

radio ☐

personal contact with costumers

internet

social media

direct email ☐

Other

Other

[illegible]

## Section F: Ordering and delivery

## webshop / internet

[illegible]

e-mail

[illegible]

telephone

[illegible]

personal

[illegible]weekly ☐

every two weeks

monthly ☐

seasonal

|          |  |
|----------|--|
| variable |  |
|----------|--|

[illegible]

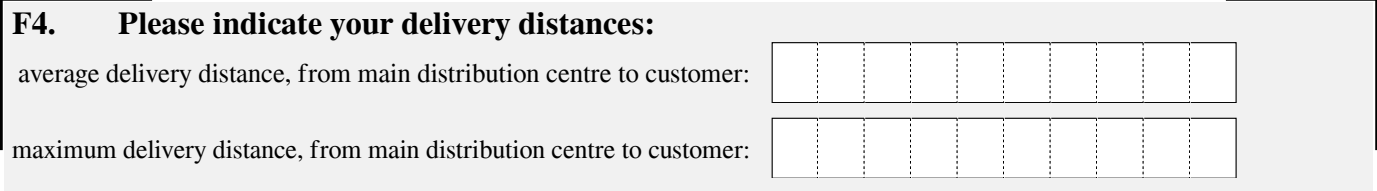[illegible]

**leaflets in boxes**

**printed newsletter**

**digital newsletter**

**open days**

**telephone**

**e-mail**

**Other**

**Other**

personal

e-mail

organized meetings for producers at your company

Other

Other

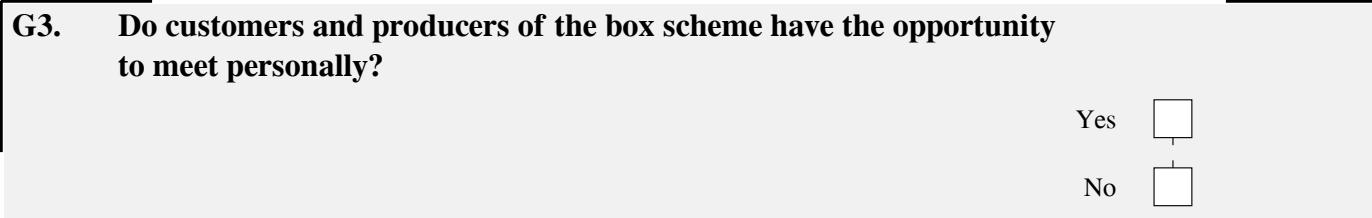

|                                          |                          |
|------------------------------------------|--------------------------|
| Name of producer (farm/farmer/processor) | <input type="checkbox"/> |
| Origin (region/country)                  | <input type="checkbox"/> |
| Portraits of producers / processors      | <input type="checkbox"/> |
| Description of products                  | <input type="checkbox"/> |
| Recipes                                  | <input type="checkbox"/> |
| Other                                    | <input type="checkbox"/> |

[illegible]

**H1. How important are the following goals and values for your company?**

**2 = considered but not very important**

**3 = moderately important**

**4 = important**

**5 = extremely important**

1 2 3 4 5

organic production

personal interaction between farmers and consumers

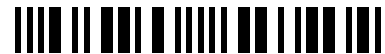

|                              | 1                        | 2                        | 3                        | 4                        | 5                        |
|------------------------------|--------------------------|--------------------------|--------------------------|--------------------------|--------------------------|
| local production             | <input type="checkbox"/> |
| quality production           | <input type="checkbox"/> |
| supporting small-scale farms | <input type="checkbox"/> |
| artisan production           | <input type="checkbox"/> |
| traditional agriculture      | <input type="checkbox"/> |
| reducing transport           | <input type="checkbox"/> |
| reducing CO2-emissions       | <input type="checkbox"/> |
| fair wages                   | <input type="checkbox"/> |
| supporting social projects   | <input type="checkbox"/> |
| community building           | <input type="checkbox"/> |
| transparency                 | <input type="checkbox"/> |
| transfer of knowledge        | <input type="checkbox"/> |
| sustainability               | <input type="checkbox"/> |

## Section I: Final questions

**I1. Would you agree to be contacted for a 30 min Skype-interview about other aspects of your box scheme?**

Yes ☐

No ☐

**I2. Thank you very much for your valuable time and information!**

**Please feel free to give us additional comments or feedback:**



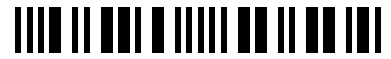

**Thank you for your valuable time and information!**

**You can contact us:**

**boxschemes\_na@boku.ac.at (student team)**

**susanne.kummer@boku.ac.at (teacher and supervisor)**

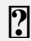

Supplement: s1 [file s1]
